# Supplementary material for: Exploring the Prevalence and Components of Metabolic Syndrome in Sub-Saharan African Type 2 Diabetes Mellitus Patients: A Systematic Review and Meta-Analysis
Source: J Obes. 2024 Feb 19;2024:1240457. doi: 10.1155/2024/1240457 (PMC10896656; doi:10.1155/2024/1240457)
Supplement: Supplementary Materials — S1 Tables: search strategies used for final search of databases. S2 Tables: subgroup analysis results based on NCEP-ATP III 2004 and IDF criteria. [file 1240457.f1.zip]

Archive with 3 entries (3 files):
- Revised_PRISMA_2020_checklist.docx
- S 1 Tables- Database Search Strategy.docx
- S 2 Tables for Subgroup analysis (1).docx
